# Supplementary material for: Up-Scalable Fabrication of SnO2 with Multifunctional Interface for High Performance Perovskite Solar Modules
Source: PubMed Central journal article supplement (PMC8271052; doi:10.1007/s40820-021-00675-7), 2021-07-10
Supplement: 40820_2021_675_MOESM1_ESM.pdf [file 40820_2021_675_MOESM1_ESM.pdf]

# Supporting information

## Up-Scalable Fabrication of SnO<sub>2</sub> with Multifunctional Interface for High Performance Perovskite Solar Modules

Guoqing Tong, Luis K. Ono, Yuqiang Liu, Hui Zhang, Tongle Bu, and Yabing Qi\*

Energy Materials and Surface Sciences Unit (EMSSU)

Okinawa Institute of Science and Technology Graduate University (OIST)

1919-1 Tancha, Onna-son, Kunigami-gun, Okinawa 904-0495, Japan

\*Corresponding author: Yabing Qi, E-mail: [Yabing.Qi@OIST.jp](mailto:Yabing.Qi@OIST.jp)

### List of Contents

#### 1. Supplementary Figures

**Fig. S1** pH value of the CBD-SnO<sub>2</sub> precursor solution after heating at 95 °C for 3 hours (as depicted in Fig. 1b, Step ②).

**Fig. S2** XPS spectra of the Cl 2p core-level region on SnO<sub>2</sub>-ETL and SnO<sub>2</sub>/K-ETL films.

**Fig. S3** Dark I–V curves of the SnO<sub>2</sub> films based on the FTO/SnO<sub>2</sub>/Au structure.

**Fig. S4** The relationship of  $(\alpha h\nu)^2$  vs energy ( $h\nu$ ) for the SnO<sub>2</sub>-ETL film and SnO<sub>2</sub>/K-ETL film.

**Fig. S5** SEM images of FTO, SnO<sub>2</sub>-ETL and SnO<sub>2</sub>/K-ETL films.

**Fig. S6** Tapping-mode AFM images of (a) FTO substrate, (a) SnO<sub>2</sub>-ETL film and (b) SnO<sub>2</sub>/K-ETL film.

**Fig. S7** Grain size distributions of the perovskite films on (a, c) the SnO<sub>2</sub> and (b, d) SnO<sub>2</sub>/K substrates. Scale bars are all 1 μm.

**Fig. S8** The distribution of K, Mn, Sn and Pb ions determined from the secondary ion mass spectrometry (SIMS) measurement for the perovskite film (a) without and with annealing.

**Fig. S9** (a) Absorbance of the perovskite films based on the SnO<sub>2</sub> and SnO<sub>2</sub>/K substrates. (b) The corresponding optical bandgap of the perovskite films deduced by the Kubelka-

Munk equations. UPS spectra of (c) the valence features, and (d) secondary electron onset of the perovskite films based on the SnO<sub>2</sub> and SnO<sub>2</sub>/K substrates.

**Fig. S10** The energy level diagram for SnO<sub>2</sub>-ETL, SnO<sub>2</sub>/K-ETL and perovskite.

**Fig. S11** Thickness of the perovskite film determined by the cross-section SEM image.

**Fig. S12** Low magnification cross-section SEM images of the PSCs based on the SnO<sub>2</sub> with/without KMnO<sub>4</sub> treatment.

**Fig. S13** J-V curves of the SnO<sub>2</sub> based PSCs with different amounts of KMnO<sub>4</sub>.

**Fig. S14** Statistical distribution of SnO<sub>2</sub>-PSCs and SnO<sub>2</sub>/K-PSCs based on 10 devices. (a) V<sub>oc</sub>, (b) J<sub>sc</sub> and (c) FF.

**Fig. S15** XRD of SnO<sub>2</sub>-PSC and SnO<sub>2</sub>/K-PSCs after storage for 5 months in ambient air in a dry room with a relative humidity of ~20% without encapsulation.

**Fig. S16** J-V curves of the SnO<sub>2</sub>-PSCs and SnO<sub>2</sub>/K-PSCs based on 10 devices after 5 months storage in ambient air in a dry room with a relative humidity of ~20% without encapsulation.

**Fig. S17** Schematic drawing showing the side view of the perovskite solar module showing the interconnections including P1, P2, P3 lines.

**Fig. S18** (a) Top view of the 5 × 5 cm<sup>2</sup> FTO substrate pattern. (b) Optical photograph of the sub-cell separation including P1, P2 and P3 patterns in the 5 × 5 cm<sup>2</sup> SnO<sub>2</sub>/K-PSM. The corresponding geometric fill factor (GFF) is determined to be approximately 0.905.

**Fig. S19** J-V curves of the 5 × 5 cm<sup>2</sup> PSMs based on 10 devices under reverse scan for (a) SnO<sub>2</sub>-PSMs. (b) SnO<sub>2</sub>/K-PSMs.

**Fig. S20** J-V curves of the 10 × 10 cm<sup>2</sup> SnO<sub>2</sub>/K-PSMs based on 10 devices under reverse scan.

**Fig. S21** (a) Top view of the 10 × 10 cm<sup>2</sup> FTO substrate pattern. (b) Optical photograph of the sub-cell separation including P1, P2 and P3 patterns in 10 × 10 cm<sup>2</sup> SnO<sub>2</sub>/K-PSM. The corresponding GFF is determined to be approximately 0.860.

**Fig. S22** Operational stability of the 5 × 5 cm<sup>2</sup> PSMs with encapsulation under a steady applied voltage and constant illumination (AM 1.5G, 100 mW cm<sup>-2</sup>).

## 2. Supplementary Tables

**Table S1** The comparison of the efficiency and active area of perovskite solar cells by employing chemical bath deposition.

**Table S2** Fast and slow components for the TRPL decay.

**Table S3** Photovoltaics parameters of the SnO<sub>2</sub> based PSCs with different amounts of KMnO<sub>4</sub>.

**Table S4** Statistical photovoltaic parameters of open-circuit voltage ( $V_{oc}$ ), short-circuit photocurrent density ( $J_{sc}$ ), fill factor (FF) and power conversion efficiency (PCE) of the SnO<sub>2</sub>-PSCs and SnO<sub>2</sub>/K-PSCs based on 10 devices.

**Table S5** Fitting parameters of the EIS measurement of the PSCs based on the SnO<sub>2</sub> and SnO<sub>2</sub>/K substrates.

**Table S6** Statistical photovoltaic parameters of open-circuit voltage ( $V_{oc}$ ), short-circuit photocurrent density ( $J_{sc}$ ), fill factor (FF) and power conversion efficiency (PCE) of the SnO<sub>2</sub>-PSCs and SnO<sub>2</sub>/K-PSCs based on 10 devices after 5 months storage in ambient air in a dry room with a relative humidity of ~20% without any encapsulation.

**Table S7** Photovoltaics parameters of 10 SnO<sub>2</sub> based perovskite solar modules ( $5 \times 5$  cm<sup>2</sup> PSMs) under reverse scan.

**Table S8** Photovoltaics parameters of 10 SnO<sub>2</sub>/K based perovskite solar modules ( $5 \times 5$  cm<sup>2</sup> PSMs) under reverse scan.

**Table S9** Photovoltaics parameters of the champion efficiency of the SnO<sub>2</sub>/K based perovskite solar modules ( $5 \times 5$  cm<sup>2</sup> PSMs).

**Table S10** The comparison of the efficiency and operational stability of perovskite solar modules with the area over 20 cm<sup>2</sup>.

**Table S11** Photovoltaics parameters of 10 SnO<sub>2</sub>/K based perovskite solar modules ( $10 \times 10$  cm<sup>2</sup> PSMs) under reverse scan.

## Figures

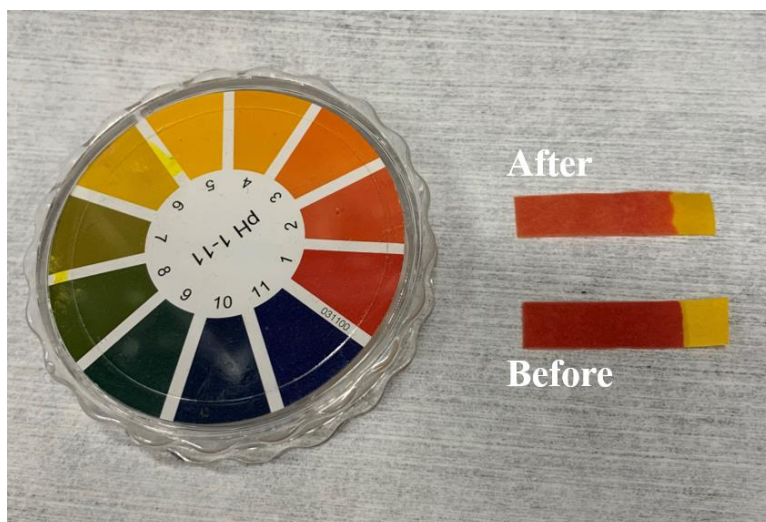

**Fig. S1** pH value of the CBD-SnO<sub>2</sub> precursor solution after heating at 95 °C for 3 hours (as depicted in Fig. 1b, Step ②)

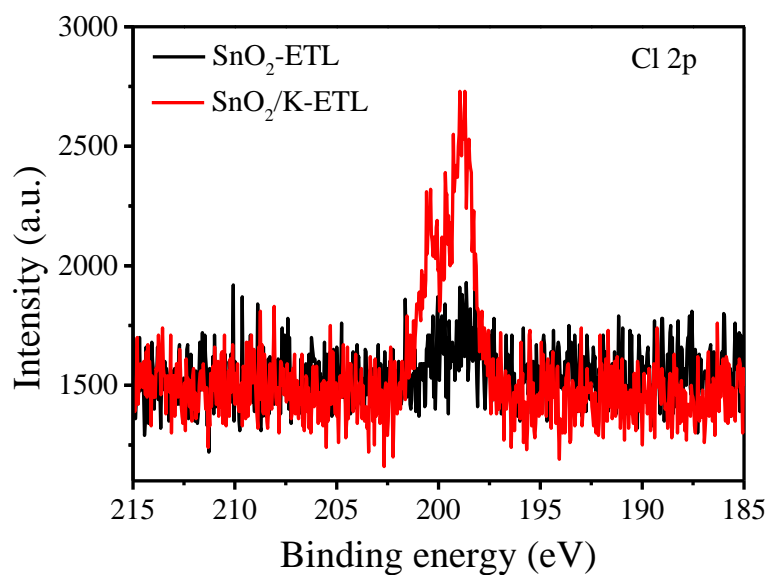

**Fig. S2** XPS spectra of the Cl 2p core-level region on SnO<sub>2</sub>-ETL and SnO<sub>2</sub>/K-ETL films.

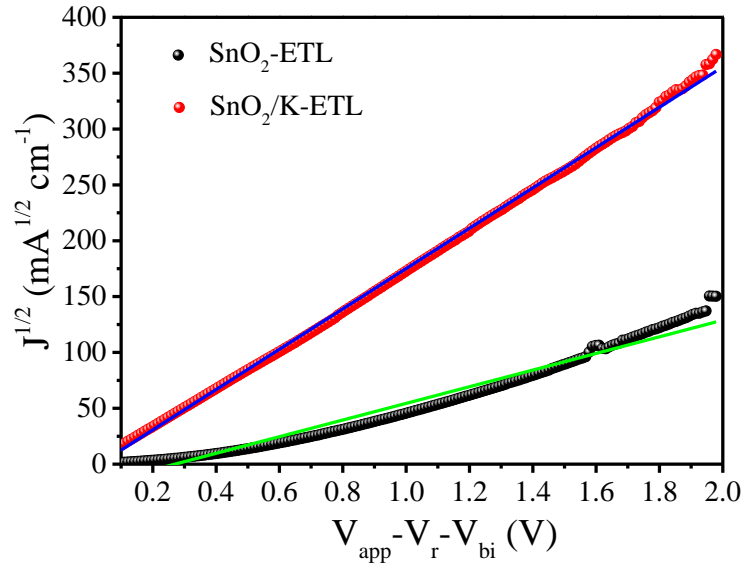

**Fig. S3** Dark I-V curves of the SnO<sub>2</sub> films based on the FTO/SnO<sub>2</sub>/Au structure.

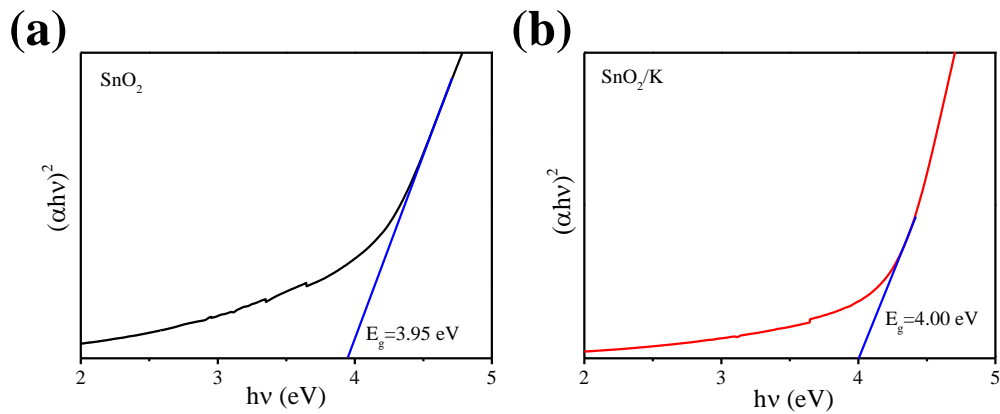

**Fig. S4** The relationship of  $(\alpha h\nu)^2$  vs energy ( $h\nu$ ) for the SnO<sub>2</sub>-ETL film and SnO<sub>2</sub>/K-ETL film.

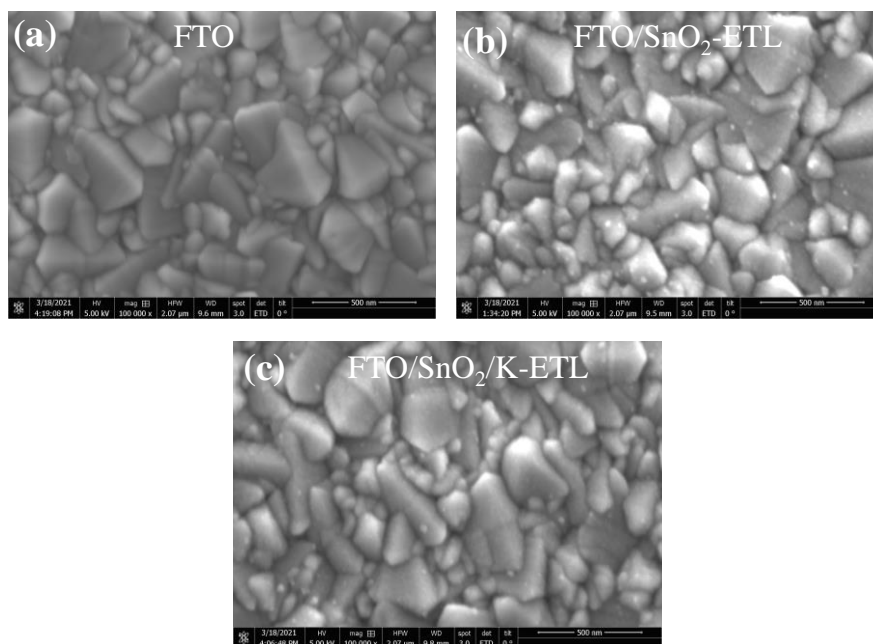

**Fig. S5** SEM images of FTO, SnO<sub>2</sub>-ETL and SnO<sub>2</sub>/K-ETL films.

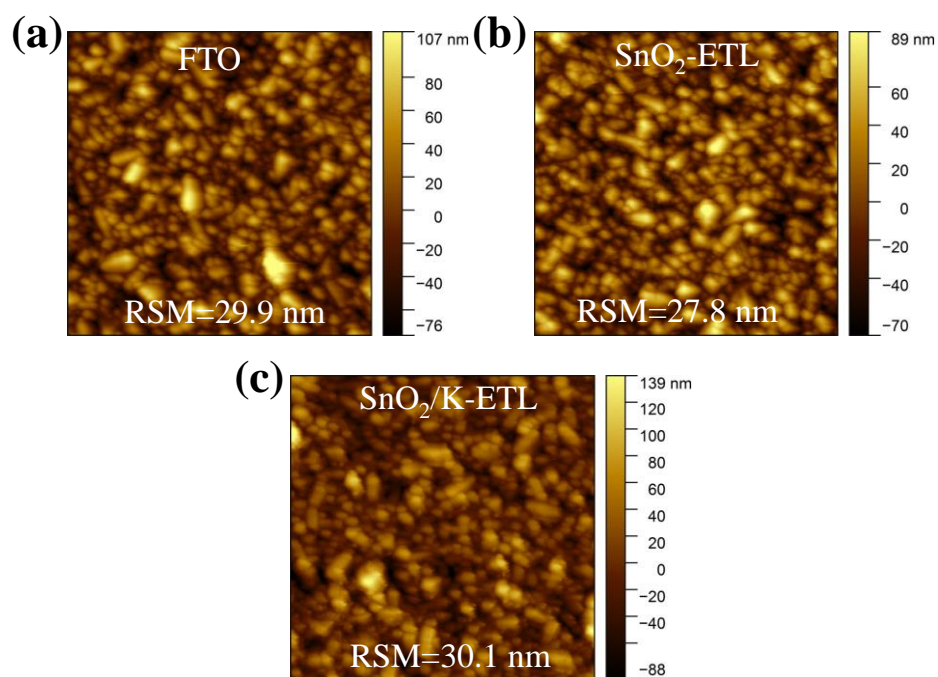

**Fig. S6** Tapping-mode AFM images of (a) FTO substrate, (a) SnO<sub>2</sub>-ETL film and (b) SnO<sub>2</sub>/K-ETL film.

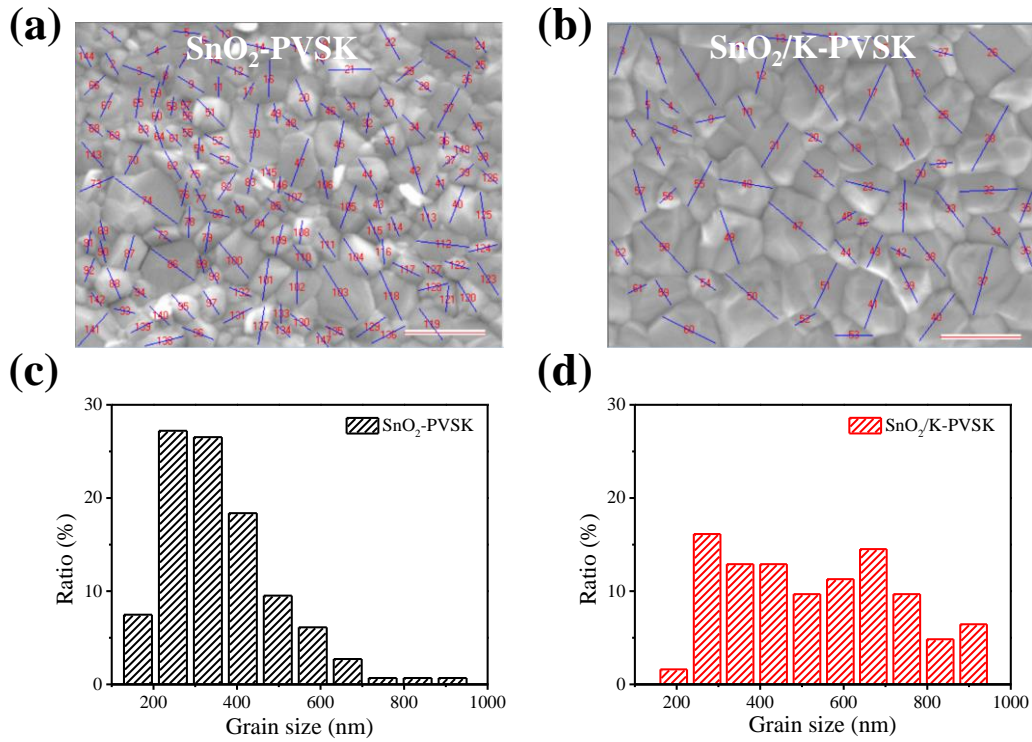

**Fig. S7** Grain size distributions of the perovskite films on (a, c) the SnO<sub>2</sub> and (b, d) SnO<sub>2</sub>/K substrates. Scale bars are all 1  $\mu$ m.

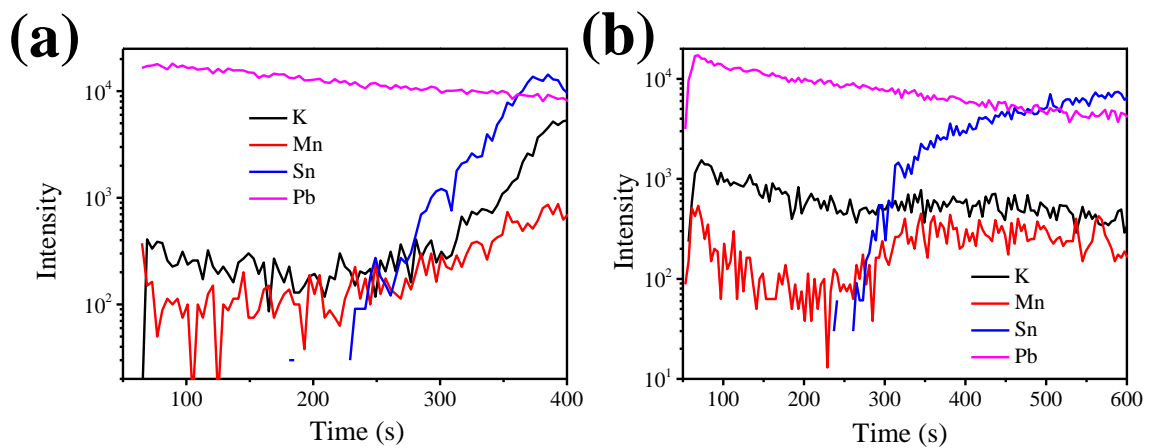

**Fig. S8** The distribution of K, Mn, Sn and Pb ions determined from the secondary ion mass spectrometry (SIMS) measurement for the perovskite film (a) without and with annealing.

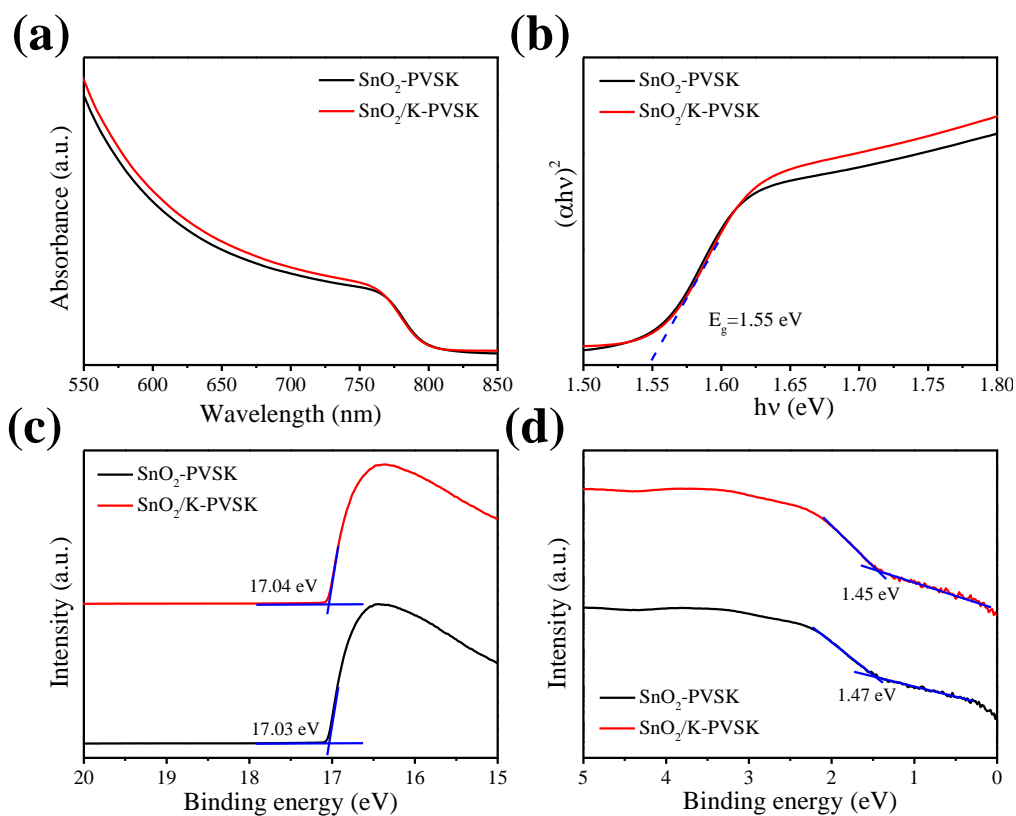

**Fig. S9** (a) Absorbance of the perovskite films based on the SnO<sub>2</sub> and SnO<sub>2</sub>/K substrates. (b) The corresponding optical bandgap of the perovskite films deduced by the Kubelka-Munk equations. UPS spectra of (c) the valence features, and (d) secondary electron onset of the perovskite films based on the SnO<sub>2</sub> and SnO<sub>2</sub>/K substrates.



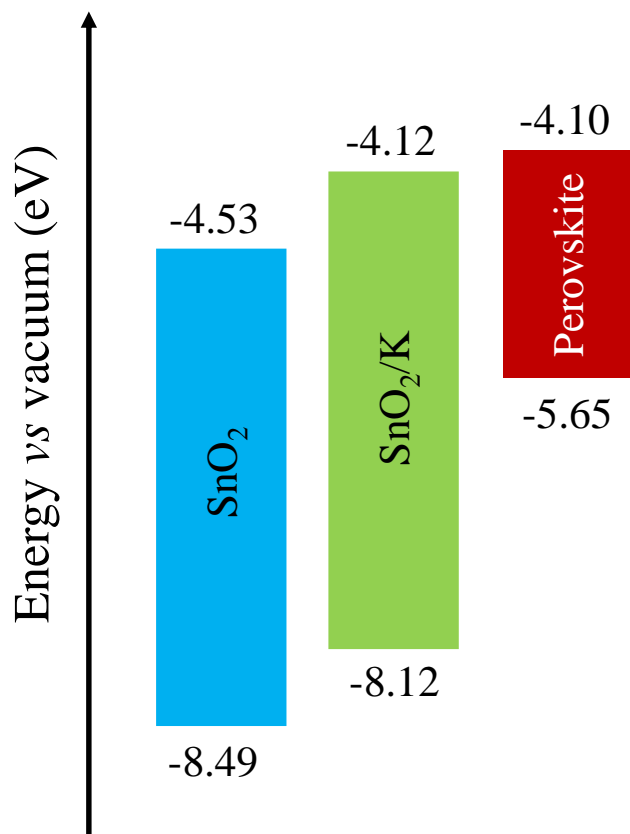

**Fig. S10** The energy level diagram for SnO<sub>2</sub>-ETL, SnO<sub>2</sub>/K-ETL and perovskite.

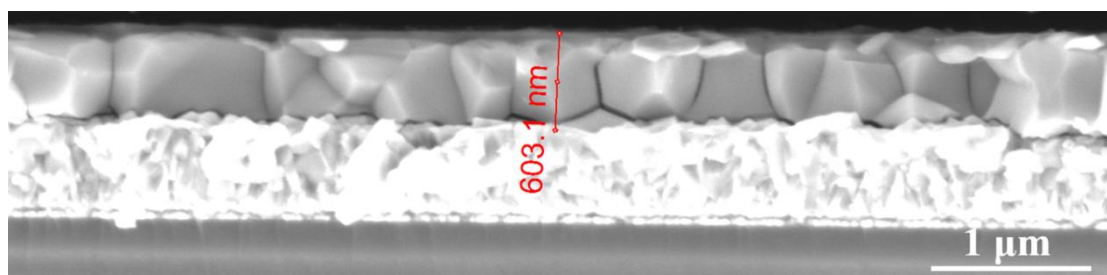

**Fig. S11** Thickness of the perovskite film determined by the cross-section SEM image.

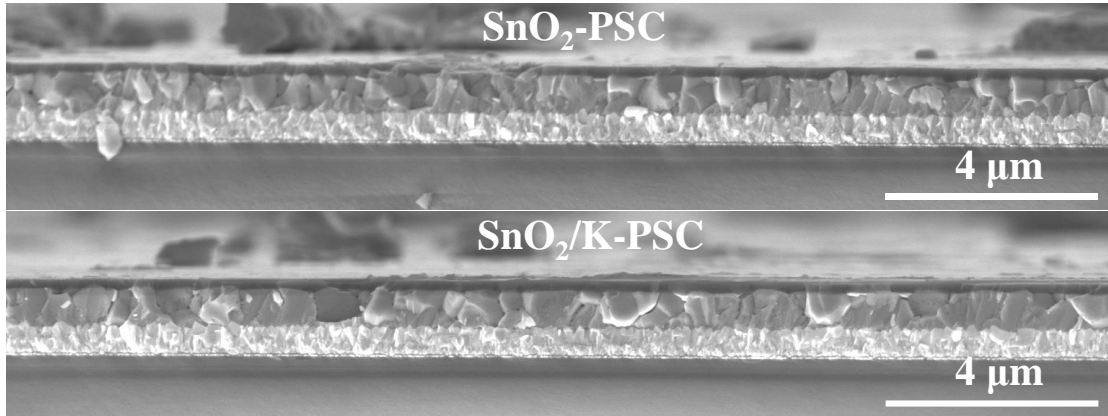

**Fig. S12** Low magnification cross-section SEM images of the PSCs based on the SnO<sub>2</sub> with/without KMnO<sub>4</sub> treatment.

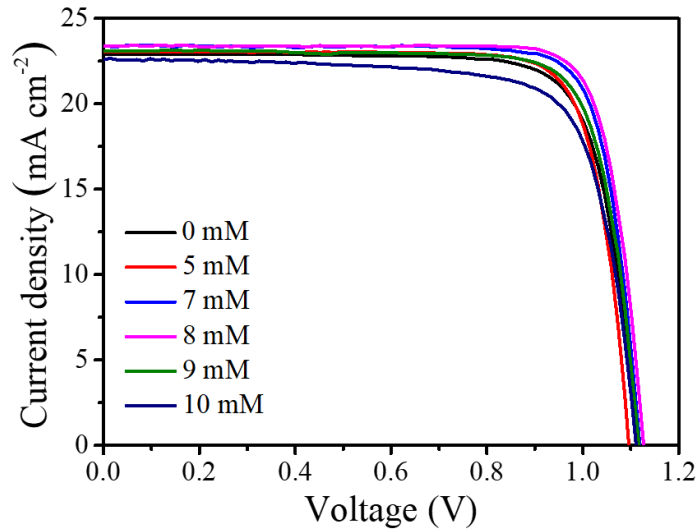

**Fig. S13** J-V curves of the SnO<sub>2</sub> based PSCs with different amounts of KMnO<sub>4</sub>.

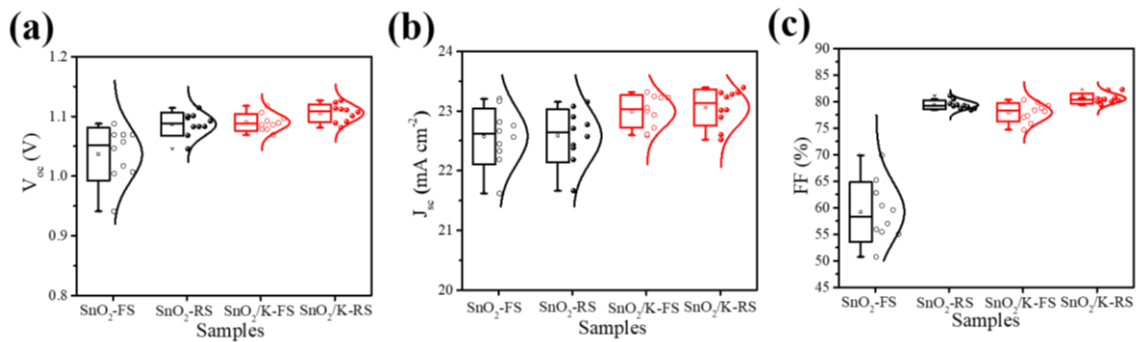

**Fig. S14** Statistical distribution of SnO<sub>2</sub>-PSCs and SnO<sub>2</sub>/K-PSCs based on 10 devices. (a)  $V_{oc}$ , (b)  $J_{sc}$  and (c) FF.

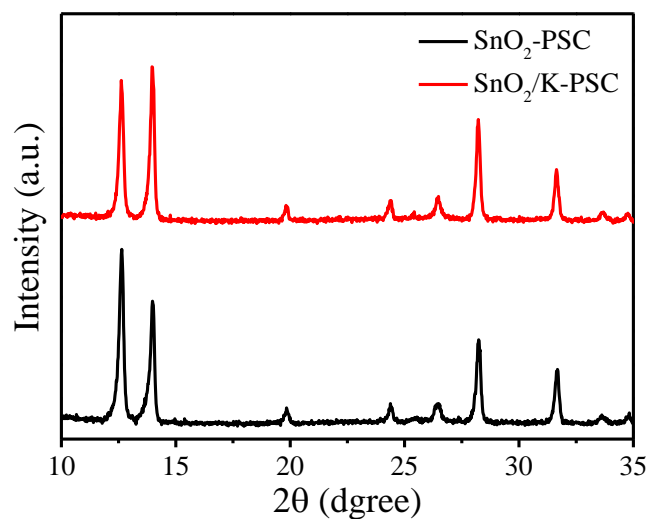

**Fig. S15** XRD of SnO<sub>2</sub>-PSC and SnO<sub>2</sub>/K-PSCs after storage for 5 months in ambient air in a dry room with a relative humidity of ~20% without encapsulation.

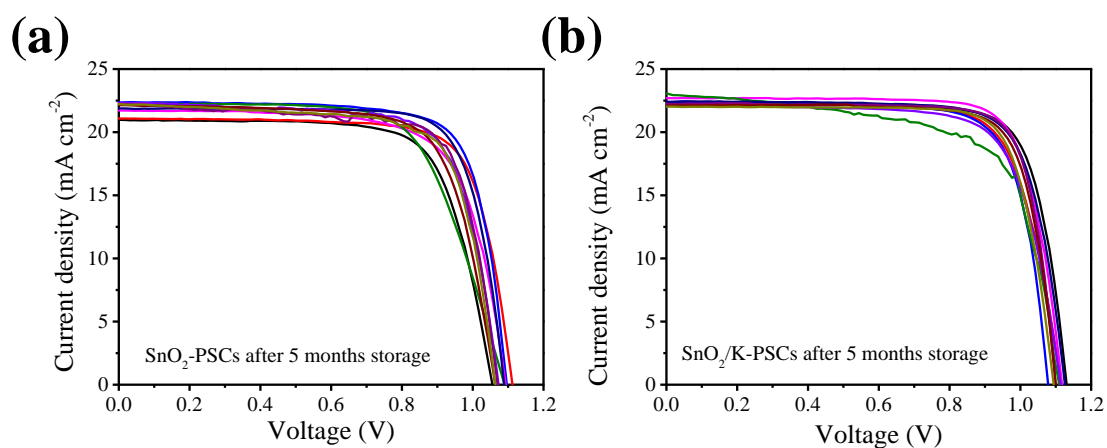

**Fig. S16** J-V curves of the SnO<sub>2</sub>-PSCs and SnO<sub>2</sub>/K-PSCs based on 10 devices after 5 months storage in ambient air in a dry room with a relative humidity of ~20% without encapsulation.

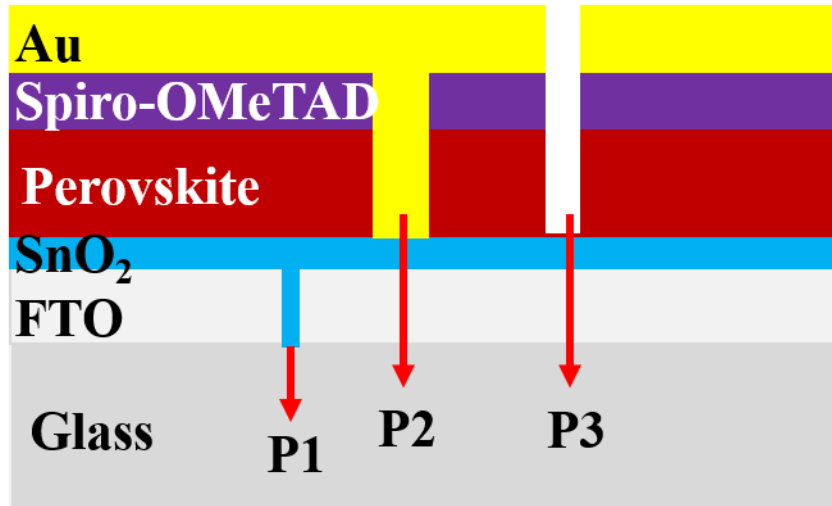

**Fig. S17** Schematic drawing showing the side view of the perovskite solar module showing the interconnections including P1, P2, P3 lines.

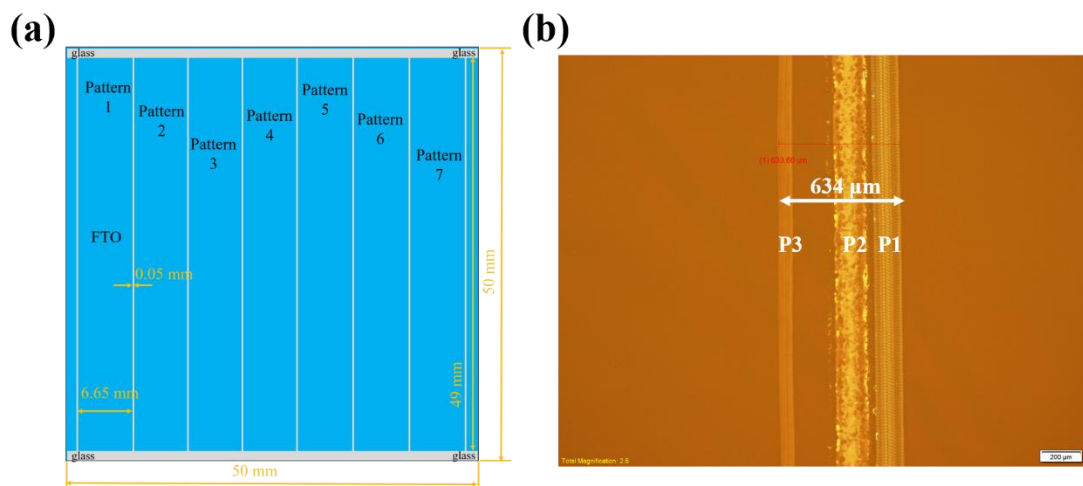

**Fig. S18** (a) Top view of the  $5 \times 5 \text{ cm}^2$  FTO substrate pattern. (b) Optical photograph of the sub-cell separation including P1, P2 and P3 patterns in the  $5 \times 5 \text{ cm}^2$   $\text{SnO}_2/\text{K-PSM}$ . The corresponding geometric fill factor (GFF) is determined to be approximately 0.905.

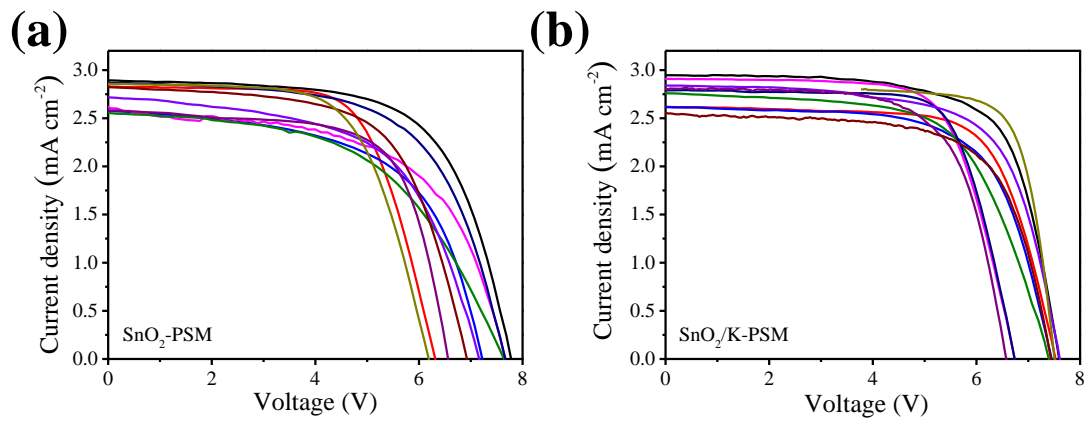

**Fig. S19** J-V curves of the  $5 \times 5 \text{ cm}^2$  PSMs based on 10 devices under reverse scan for (a) SnO<sub>2</sub>-PSMs. (b) SnO<sub>2</sub>/K-PSMs.

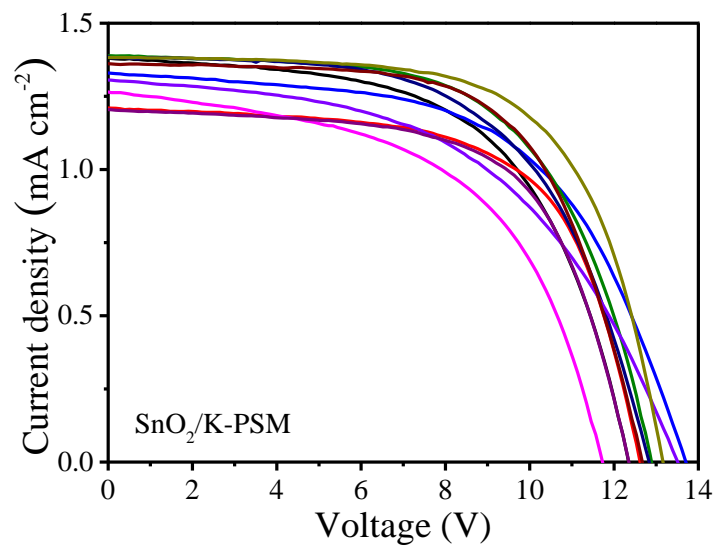

**Fig. S20** J-V curves of the  $10 \times 10 \text{ cm}^2$  SnO<sub>2</sub>/K-PSMs based on 10 devices under reverse scan.

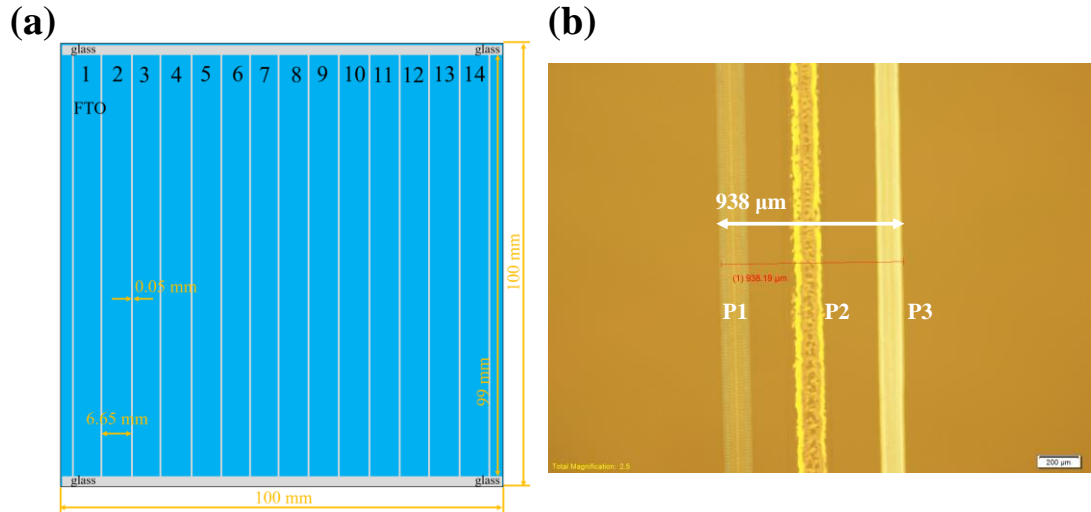

**Fig. S21** (a) Top view of the  $10 \times 10 \text{ cm}^2$  FTO substrate pattern. (b) Optical photograph of the sub-cell separation including P1, P2 and P3 patterns in  $10 \times 10 \text{ cm}^2$   $\text{SnO}_2/\text{K}$ -PSM. The corresponding GFF is determined to be approximately 0.860.

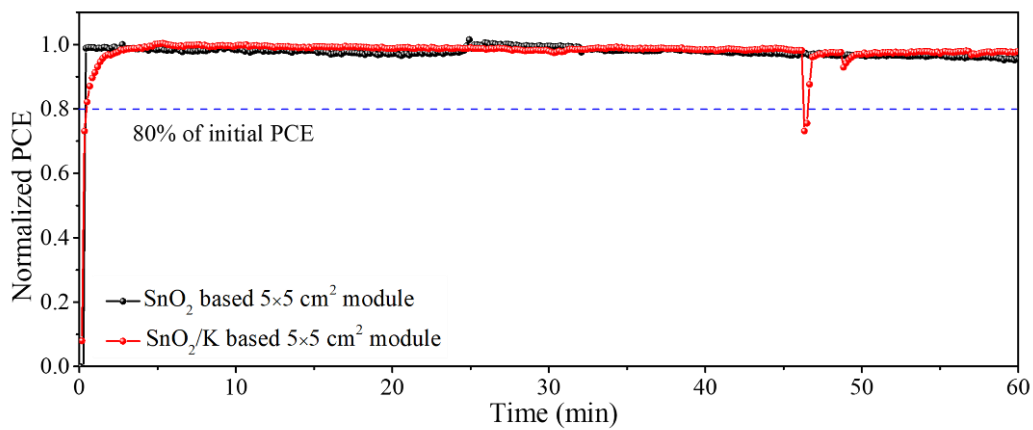

**Fig. S22** Operational stability of the  $5 \times 5 \text{ cm}^2$  PSMs with encapsulation under a steady applied voltage and constant illumination (AM 1.5G,  $100 \text{ mW cm}^{-2}$ ).

## Tables

**Table S1** The comparison of the efficiency and active area of perovskite solar cells by employing chemical bath deposition.

| SnO <sub>2</sub> deposition | Device                                   | Active area (cm <sup>2</sup> ) | Total area (cm <sup>2</sup> ) | PCE <sup>a</sup> (%) | PCE <sup>b</sup> (%) | Lifetime               | Ref.      |
|-----------------------------|------------------------------------------|--------------------------------|-------------------------------|----------------------|----------------------|------------------------|-----------|
| CBD                         | FTO/SnO <sub>2</sub> /PVSK/Spiro/Au      | 0.09                           | /                             | /                    | 21.70                | /                      | This work |
|                             |                                          | 22.4                           | 25<br>(5 × 5)                 | 15.62                | 17.26                | 1006 h/T <sub>80</sub> |           |
|                             |                                          | 91.8                           | 100<br>(10 × 10)              | 11.80                | 13.72                | /                      |           |
| CBD                         | FTO/SnO <sub>2</sub> /PVSK/Spiro/Au      | 0.0937                         | /                             | /                    | 25.4                 | /                      | [1]       |
|                             |                                          | 0.984                          | /                             | /                    | 23                   | /                      |           |
| CBD                         | FTO/SnO <sub>2</sub> /PVSK/Spiro/Au      | 0.16                           | /                             | /                    | 20.56                | /                      | [2]       |
|                             |                                          | 20.0                           | 36<br>(6 × 6)                 | /                    | 15.76                | /                      |           |
| CBD                         | FTO/SnO <sub>2</sub> /PCBM/PVSK/Spiro/Ag | 0.0919                         | /                             | /                    | 17.1                 | /                      | [3]       |
| CBD                         | FTO/SnO <sub>2</sub> /PVSK/Spiro/Au      | 0.16                           | /                             | /                    | 20.7                 | /                      | [4]       |
| CBD                         | FTO/SnO <sub>2</sub> /PVSK/Spiro/Au      | 0.049                          | /                             | /                    | 23.2                 | /                      | [5]       |
| CBD                         | ITO/SnO <sub>2</sub> /PVSK/Spiro/Au      | 0.1                            | /                             | /                    | 14.8                 | /                      | [6]       |
| Spin-coating+CBD            | FTO/SnO <sub>2</sub> /PVSK/SWNT-Spiro/Ag | 0.0919                         | /                             | /                    | 18.8                 | /                      | [7]       |

(Note: a is designated area of solar module; b is normalized by active area.)

**Table S2** Fast and slow components for the TRPL decay.

| Sample              | A <sub>1</sub> (%) | τ <sub>1</sub> (ns) | A <sub>2</sub> (%) | τ <sub>2</sub> (ns) | τ <sub>average</sub> (ns) |
|---------------------|--------------------|---------------------|--------------------|---------------------|---------------------------|
| SnO <sub>2</sub>    | 0.656              | 143.8               | 0.344              | 9.2                 | 139.4                     |
| SnO <sub>2</sub> /K | 0.623              | 76.3                | 0.382              | 10.3                | 71.3                      |

**Table S3** Photovoltaics parameters of the SnO<sub>2</sub> based PSCs with different amounts of KMnO<sub>4</sub>.

| Sample | Scan direction | V <sub>oc</sub> (V) | J <sub>sc</sub> (mA cm <sup>-2</sup> ) | FF    | PCE (%) | HI   |
|--------|----------------|---------------------|----------------------------------------|-------|---------|------|
| 0 mM   | FS.            | 1.069               | 22.82                                  | 0.699 | 17.05   | 1.18 |
|        | RS.            | 1.114               | 22.90                                  | 0.787 | 20.09   |      |
| 5 mM   | FS.            | 1.056               | 23.03                                  | 0.728 | 17.72   | 1.15 |
|        | RS.            | 1.096               | 23.06                                  | 0.807 | 20.39   |      |
| 7 mM   | FS.            | 1.107               | 23.28                                  | 0.778 | 20.07   | 1.06 |
|        | RS.            | 1.118               | 23.39                                  | 0.817 | 21.36   |      |
| 8 mM   | FS.            | 1.118               | 23.22                                  | 0.792 | 20.58   | 1.05 |
|        | RS.            | 1.127               | 23.39                                  | 0.823 | 21.70   |      |
| 9 mM   | FS.            | 1.108               | 23.08                                  | 0.786 | 20.10   | 1.03 |
|        | RS.            | 1.117               | 23.10                                  | 0.799 | 20.62   |      |
| 10 mM  | FS.            | 1.106               | 22.88                                  | 0.772 | 19.53   | 0.97 |
|        | RS.            | 1.111               | 22.61                                  | 0.757 | 19.03   |      |

**Table S4** Statistical photovoltaic parameters of open-circuit voltage (V<sub>oc</sub>), short-circuit photocurrent density (J<sub>sc</sub>), fill factor (FF) and power conversion efficiency (PCE) of the SnO<sub>2</sub>-PSCs and SnO<sub>2</sub>/K-PSCs based on 10 devices.

| Sample              | Scan direction | V <sub>oc</sub> (V) | J <sub>sc</sub> (mA cm <sup>-2</sup> ) | FF        | PCE (%)  | HI   |
|---------------------|----------------|---------------------|----------------------------------------|-----------|----------|------|
| SnO <sub>2</sub>    | FS.            | 1.04±0.04           | 22.6±0.4                               | 0.59±0.05 | 13.9±1.4 | 1.40 |
|                     | RS.            | 1.09±0.02           | 22.6±0.4                               | 0.79±0.01 | 19.5±0.5 |      |
| SnO <sub>2</sub> /K | FS.            | 1.09±0.01           | 23.0±0.3                               | 0.78±0.02 | 19.5±0.5 | 1.05 |
|                     | RS.            | 1.11±0.01           | 23.1±0.3                               | 0.81±0.01 | 20.6±0.5 |      |



**Table S5** Fitting parameters of the EIS measurement of the PSCs based on the SnO<sub>2</sub> and SnO<sub>2</sub>/K substrates.

| Sample              | R <sub>s</sub><br>(Ω) | R <sub>ct</sub><br>(Ω) |
|---------------------|-----------------------|------------------------|
| SnO <sub>2</sub>    | 26.01                 | 62.57                  |
| SnO <sub>2</sub> /K | 16.67                 | 22.44                  |

**Table S6** Statistical photovoltaic parameters of open-circuit voltage (V<sub>oc</sub>), short-circuit photocurrent density (J<sub>sc</sub>), fill factor (FF) and power conversion efficiency (PCE) of the SnO<sub>2</sub>-PSCs and SnO<sub>2</sub>/K-PSCs based on 10 devices after 5 months storage in ambient air in a dry room with a relative humidity of ~20% without any encapsulation

| Sample              | V <sub>oc</sub> (V) | J <sub>sc</sub> (mA cm <sup>-2</sup> ) | FF        | PCE (%)  |
|---------------------|---------------------|----------------------------------------|-----------|----------|
| SnO <sub>2</sub>    | 1.08±0.02           | 21.9±0.5                               | 0.73±0.03 | 17.4±0.8 |
| SnO <sub>2</sub> /K | 1.11±0.01           | 22.4±0.3                               | 0.76±0.04 | 18.8±0.8 |

**Table S7** Photovoltaics parameters of 10 SnO<sub>2</sub> based perovskite solar modules (5 × 5 cm<sup>2</sup> PSMs) under reverse scan.

| Sample | V <sub>oc</sub><br>(V) | J <sub>sc</sub><br>(mA cm <sup>-2</sup> ) | FF    | PCE<br>(%) |
|--------|------------------------|-------------------------------------------|-------|------------|
| 1      | 7.158                  | 2.72                                      | 0.582 | 11.34      |
| 2      | 6.560                  | 2.59                                      | 0.677 | 11.48      |
| 3      | 6.920                  | 2.82                                      | 0.632 | 12.36      |
| 4      | 6.186                  | 2.86                                      | 0.647 | 11.44      |
| 5      | 7.663                  | 2.87                                      | 0.620 | 13.64      |
| 6      | 7.635                  | 2.56                                      | 0.530 | 10.35      |
| 7      | 7.656                  | 2.60                                      | 0.580 | 11.55      |
| 8      | 6.311                  | 2.83                                      | 0.677 | 12.09      |
| 9      | 7.218                  | 2.58                                      | 0.583 | 10.87      |
| 10     | 7.770                  | 2.89                                      | 0.649 | 14.58      |

|         |             |           |             |            |
|---------|-------------|-----------|-------------|------------|
| Average | 7.108±0.536 | 2.73±0.12 | 0.618±0.043 | 11.97±1.16 |
|---------|-------------|-----------|-------------|------------|

**Table S8** Photovoltaics parameters of 10 SnO<sub>2</sub>/K based perovskite solar modules (5 × 5 cm<sup>2</sup> PSMs) under reverse scan.

| Sample  | V <sub>oc</sub><br>(V) | J <sub>sc</sub><br>(mA cm <sup>-2</sup> ) | FF          | PCE<br>(%) |
|---------|------------------------|-------------------------------------------|-------------|------------|
| 1       | 7.520                  | 2.62                                      | 0.706       | 13.91      |
| 2       | 7.602                  | 2.84                                      | 0.674       | 14.55      |
| 3       | 6.738                  | 2.91                                      | 0.698       | 13.68      |
| 4       | 7.400                  | 2.76                                      | 0.631       | 12.88      |
| 5       | 7.437                  | 2.55                                      | 0.674       | 12.76      |
| 6       | 6.573                  | 2.81                                      | 0.672       | 12.41      |
| 7       | 6.735                  | 2.79                                      | 0.725       | 13.63      |
| 8       | 7.478                  | 2.80                                      | 0.661       | 13.83      |
| 9       | 7.450                  | 2.62                                      | 0.664       | 12.93      |
| 10      | 7.591                  | 2.95                                      | 0.699       | 15.62      |
| Average | 7.252±0.363            | 2.76±0.12                                 | 0.680±0.024 | 13.62±0.87 |

**Table S9** Photovoltaics parameters of the champion efficiency of the SnO<sub>2</sub>/K based perovskite solar modules (5 × 5 cm<sup>2</sup> PSMs).

| Sample              | Scan direction | V <sub>oc</sub><br>(V) | J <sub>sc</sub><br>(mA cm <sup>-2</sup> ) | FF    | PCE<br>(%) | HI   |
|---------------------|----------------|------------------------|-------------------------------------------|-------|------------|------|
| SnO <sub>2</sub>    | FS.            | 7.413                  | 2.66                                      | 0.379 | 7.49       | 1.95 |
|                     | RS.            | 7.770                  | 2.89                                      | 0.649 | 14.58      |      |
| SnO <sub>2</sub> /K | FS.            | 7.166                  | 2.98                                      | 0.667 | 14.25      | 1.10 |
|                     | RS.            | 7.591                  | 2.95                                      | 0.699 | 15.62      |      |

**Table S10** The comparison of the efficiency and operational stability of perovskite solar modules with the area over 20 cm<sup>2</sup>.

| Device                                                                                                                                                                                            | Active area (cm <sup>2</sup> ) | Total area (cm <sup>2</sup> ) | PCE <sup>a</sup> (%) | PCE <sup>b</sup> (%) | Lifetime                                         | Ref       |
|---------------------------------------------------------------------------------------------------------------------------------------------------------------------------------------------------|--------------------------------|-------------------------------|----------------------|----------------------|--------------------------------------------------|-----------|
| FTO/SnO <sub>2</sub> /Cs <sub>0.05</sub> FA <sub>0.85</sub> MA <sub>0.10</sub> PbI <sub>2.85</sub> Br <sub>0.15</sub> /Spiro/Au                                                                   | 22.4                           | 25<br>(5 × 5)                 | 15.62                | 17.26                | 1006 h/T <sub>80</sub>                           | This work |
|                                                                                                                                                                                                   | 91.8                           | 100<br>(10 × 10)              | 11.80                | 13.72                | /                                                |           |
| FTO/SnO <sub>2</sub> /MAPbI <sub>3</sub> /Spiro/Au                                                                                                                                                | 21                             | 36<br>(6 × 6)                 | /                    | 18.13                | 100 h/T <sub>80</sub>                            | [8]       |
| ITO/P3HT/MAPbI <sub>3</sub> /PCBM/A <sub>g</sub>                                                                                                                                                  | 36.6                           | 49<br>(7 × 7)                 | /                    | 16.06                | 250 h/T <sub>90</sub>                            | [9]       |
| ITO/PTAA/MA <sub>0.7</sub> FA <sub>0.3</sub> PbI <sub>3</sub> /C <sub>60</sub> /BCP/Cu                                                                                                            | /                              | 35.8                          | /                    | 18.5                 | /                                                | [10]      |
| FTO/SnO <sub>2</sub> /[CsPbI <sub>3</sub> ] <sub>0.05</sub> [(FAPbI <sub>3</sub> ) <sub>0.85</sub> (MAPbBr <sub>3</sub> ) <sub>0.15</sub> ] <sub>0.95</sub> /Spiro/Au                             | 25                             | 36<br>(6.5 × 6.5)             | 15.3                 | 16.02                | /                                                | [11]      |
| FTO/TiO <sub>2</sub> /MAPbI <sub>3</sub> /Spiro/Au                                                                                                                                                | 50.6                           | 100<br>(10 × 10)              | /                    | 12.6                 | 1630 h/T <sub>80</sub>                           | [12]      |
| FTO/SnO <sub>2</sub> /(K <sub>x</sub> (Cs <sub>0.05</sub> (FA <sub>0.85</sub> MA <sub>0.15</sub> ) <sub>0.95</sub> Pb(I <sub>0.85</sub> Br <sub>0.15</sub> ) <sub>3</sub> )/Spiro/Au              | 20                             | 36<br>(6 × 6)                 | /                    | 15.76                | /                                                | [2]       |
| FTO/SnO <sub>2</sub> /(FAPbI <sub>3</sub> ) <sub>0.95</sub> (CsPbBr <sub>3</sub> ) <sub>0.05</sub> /Spiro/Au                                                                                      | ~20<br>(19.69)                 | 25<br>(5 × 5)                 | /                    | 17.94                | /                                                | [13]      |
| ITO/SnO <sub>2</sub> /Cs <sub>0.05</sub> FA <sub>0.54</sub> MA <sub>0.41</sub> Pb(I <sub>0.98</sub> Br <sub>0.02</sub> ) <sub>3</sub> /Spiro/Au                                                   | 22.4                           | 25<br>(5 × 5)                 | 14.55                | 16.35                | 1625 h/T <sub>80</sub>                           | [14]      |
| FTO/ZnO-ZnS/FA <sub>0.97</sub> Cs <sub>0.03</sub> PbI <sub>3</sub> /Spiro/Au                                                                                                                      | 49                             | 100<br>(10 × 10)              | /                    | 13.84                | /                                                | [15]      |
| FTO/TiO <sub>2</sub> /SnO <sub>2</sub> /Cs <sub>1-x</sub> FA <sub>x</sub> Pb(I <sub>y</sub> Cl <sub>1-y</sub> ) <sub>3</sub> /BJ-GO/TFB/Cr/Au                                                     | 35.8                           | 64<br>(8 × 8)                 | 15.3                 | /                    | 1000 h/T <sub>90</sub>                           | [16]      |
| ITO/SnO <sub>2</sub> /EDTAK(EAMA)/Cs <sub>0.05</sub> FA <sub>0.54</sub> MA <sub>0.41</sub> Pb(I <sub>0.98</sub> Br <sub>0.02</sub> ) <sub>3</sub> /Spiro-P3HT/Au                                  | 22.4                           | 25<br>(5 × 5)                 | 16.6                 | 18.2                 | 2680 h/T <sub>80</sub>                           | [17]      |
| FTO/SnO <sub>2</sub> /C <sub>60</sub> /Cs <sub>0.1</sub> FA <sub>0.9</sub> PbI <sub>2.9</sub> Br <sub>0.1</sub> /Spiro/Au                                                                         | 22.4                           | 25<br>(5 × 5)                 | ~10                  | /                    | 250 h/T <sub>90</sub><br>500 h/T <sub>80</sub>   | [18]      |
|                                                                                                                                                                                                   | 91.8                           | 100<br>(10 × 10)              | 9.34                 | 10.37                | /                                                |           |
| FTO/NiO <sub>x</sub> /[CH(NH <sub>2</sub> ) <sub>2</sub> ] <sub>0.85</sub> [CH <sub>3</sub> NH <sub>3</sub> ] <sub>0.15</sub> Pb(I <sub>0.85</sub> Br <sub>0.15</sub> ) <sub>3</sub> /PCBM/BCP/Ag | 36.1 <sup>ap</sup>             | 64<br>(8 × 8)                 | /                    | 15.6                 | 1000 h/T <sub>91</sub><br>2222 h/T <sub>80</sub> | [19]      |
| FTO/SnO <sub>2</sub> /MAPbI <sub>3</sub> /Spiro/Au                                                                                                                                                | 22.8                           | 25<br>(5 × 5)                 | 12.03                | /                    | 280 h/T <sub>90</sub><br>515 h/T <sub>80</sub>   | [20]      |
| FTO/TiO <sub>2</sub> /MAPbI <sub>3</sub> /Spiro/Au                                                                                                                                                | 36.1 <sup>ap</sup>             | 64                            | /                    | 15.7                 | 500 h/T <sub>90</sub>                            | [21]      |

|                                                                                                             |      |                  |   |       |                        |      |
|-------------------------------------------------------------------------------------------------------------|------|------------------|---|-------|------------------------|------|
|                                                                                                             |      | (8 × 8)          |   |       | 1000 h/T <sub>80</sub> |      |
| FTO/TiO <sub>2</sub> /ZrO <sub>2</sub> /(5-AVA) <sub>x</sub> (MA) <sub>1-x</sub> PbI <sub>3</sub> /carbon   | 49   | 100<br>(10 × 10) | / | 10.4  | 1000 h                 | [22] |
| FTO/c-TiO <sub>2</sub> /ZrO <sub>2</sub> /(5-AVA) <sub>x</sub> (MA) <sub>1-x</sub> PbI <sub>3</sub> /carbon | 46.7 | 100<br>(10 × 10) | / | 11.2  | > 10000 h              | [23] |
| FTO/TiO <sub>2</sub> /ZrO <sub>2</sub> /(5-AVA) <sub>x</sub> (MA) <sub>1-x</sub> PbI <sub>3</sub> /carbon   | 31   | 50<br>(5 × 10)   | / | 10.46 | 72 h                   | [24] |
|                                                                                                             | 70   | 100<br>(10 × 10) | / | 10.75 | /                      |      |

(Note: a is designated area of solar module; b is normalized by active area.)

**Table S11** Photovoltaics parameters of 10 SnO<sub>2</sub>/K based perovskite solar modules (10 × 10 cm<sup>2</sup> PSMs) under reverse scan.

| Sample  | V <sub>oc</sub><br>(V) | J <sub>sc</sub><br>(mA cm <sup>-2</sup> ) | FF          | PCE<br>(%) |
|---------|------------------------|-------------------------------------------|-------------|------------|
| 1       | 12.337                 | 1.38                                      | 0.586       | 9.97       |
| 2       | 12.615                 | 1.21                                      | 0.634       | 9.68       |
| 3       | 13.698                 | 1.33                                      | 0.571       | 10.39      |
| 4       | 11.713                 | 1.27                                      | 0.539       | 7.99       |
| 5       | 12.880                 | 1.39                                      | 0.611       | 10.92      |
| 6       | 12.828                 | 1.38                                      | 0.588       | 10.45      |
| 7       | 13.498                 | 1.31                                      | 0.510       | 8.99       |
| 8       | 12.346                 | 1.20                                      | 0.636       | 9.45       |
| 9       | 12.661                 | 1.36                                      | 0.637       | 10.98      |
| 10      | 13.158                 | 1.38                                      | 0.648       | 11.80      |
| Average | 12.773±0.529           | 1.32±0.07                                 | 0.596±0.042 | 10.06±0.99 |

## References

1. J.J. Yoo, G. Seo, M.R. Chua, T.G. Park, Y. Lu et al., Efficient perovskite solar cells via improved carrier management. *Nature* **590**, 587-593 (2021). <https://doi.org/10.1038/s41586-021-03285-w>
2. T. Bu, X. Liu, Y. Zhou, J. Yi, X. Huang et al., A novel quadruple-cation absorber for universal hysteresis elimination for high efficiency and stable perovskite solar cells. *Energy Environ. Sci.* **10**(12), 2509-2515 (2017). <https://doi.org/10.1039/C7EE02634J>
3. D. P. McMeekin, G. Sadoughi, W. Rehman, G. E. Eperon, M.I Saliba et al., A mixed-cation lead mixed-halide perovskite absorber for tandem solar cells. *Science* **351**(6269), 151-155 (2016). <https://doi.org/10.1126/science.aad5845>
4. E.H. Anaraki, A. Kermanpur, L. Steier, K. Domanski, T. Matsui et al., Highly efficient and stable planar perovskite solar cells by solution-processed tin oxide. *Energy Environ. Sci.* **9**(10), 3128-3134 (2016). <https://doi.org/10.1039/C6EE02390H>
5. E.H. Jung, B. Chen, K. Bertens, M. Vafaie, S. Teale et al., Bifunctional surface engineering on SnO<sub>2</sub> reduces energy loss in perovskite solar cells. *ACS Energy Lett.* **5**(9), 2796-2801 (2020). <https://doi.org/10.1021/acseenergylett.0c01566>
6. J. Barbe, M.L. Tietze, M. Neophytou, B. Murali, E. Alarousu et al., Amorphous tin oxide as a low-temperature-processed electron-transport layer for organic and hybrid perovskite solar cells. *ACS Appl. Mater. Interfaces* **9**(13), 11828-11836 (2017). <https://doi.org/10.1021/acsami.6b13675>
7. S.N. Habisreutinger, B. Wenger, H.J. Snaith, R.J. Nicholas, Dopant-free planar n-i-p perovskite solar cells with steady-state efficiencies exceeding 18%. *ACS Energy Lett.* **2**(3), 622-628 (2017). <https://doi.org/10.1021/acseenergylett.7b00028>
8. J. Li, H. Wang, X.Y. Chin, H.A. Dewi, K. Vergeer et al., Highly efficient thermally co-evaporated perovskite solar cells and mini-modules, *Joule* **4**(5), 1035-1053 (2020). <https://doi.org/10.1016/j.joule.2020.03.005>
9. H.-H. Huang, Q.-H. Liu, H. Tsai, S. Shrestha, L.-Y. Su et al., A simple one-step method with wide processing window for high-quality perovskite mini-module

- fabrication. *Joule* (2021). <https://doi.org/10.1016/j.joule.2021.02.012>
10. S. Chen, X. Xiao, H. Gu, J. Huang, Iodine reduction for reproducible and high-performance perovskite solar cells and modules. *Sci. Adv.* **7**(10), eabe8130 (2021). <https://doi.org/10.1126/sciadv.abe8130>
  11. G.S. Han, J. Kim, S. Bae, S. Han, Y.J. Kim et al., Spin-coating process for 10 cm × 10 cm perovskite solar modules enabled by self-assembly of SnO<sub>2</sub> nanocolloids. *ACS Energy Lett.* **4**(8), 1845-1851 (2019). <https://doi.org/10.1021/acsenergylett.9b00953>
  12. A. Agresti, S. Pescetelli, A.L. Palma, A.E. Del Rio Castillo, D. Konios et al., Graphene interface engineering for perovskite solar modules: 12.6% power conversion efficiency over 50 cm<sup>2</sup> active area. *ACS Energy Lett.* **2**(1), 279-287 (2017). <https://doi.org/10.1021/acsenergylett.6b00672>
  13. D.-K. Lee, K.-S. Lim, J.-W. Lee, N.-G. Park, Scalable perovskite coating via anti-solvent-free Lewis acid–base adduct engineering for efficient perovskite solar modules. *J. Mater. Chem. A* **9**(5), 3018-3028 (2021). <https://doi.org/10.1039/D0TA10366G>
  14. G. Tong, D.-Y. Son, L. K. Ono, Y. Liu, Y. Hu et al., Scalable fabrication of > 90 cm<sup>2</sup> perovskite solar modules with > 1000 h operational stability based on the intermediate phase strategy. *Adv. Energy Mater.* **11**(10), 2003712 (2021). <https://doi.org/10.1002/aenm.202003712>
  15. R. Chen, Y. Wu, Y. Wang, R. Xu, R. He et al., Crown ether-assisted growth and scaling up of FACsPbI<sub>3</sub> films for efficient and stable perovskite solar modules. *Adv. Funct. Mater.* **31**(11), 2008760 (2021). <https://doi.org/10.1002/adfm.202008760>
  16. Y. Sha, E. Bi, Y. Zhang, P. Ru, W. Kong et al., A scalable integrated dopant - free heterostructure to stabilize perovskite solar cell modules. *Adv. Energy Mater.* **11**(5), (2021) 2003301. <https://doi.org/10.1002/aenm.202003301>
  17. Z. Liu, L. Qiu, L.K. Ono, S. He, Z. Hu et al., A holistic approach to interface stabilization for efficient perovskite solar modules with over 2,000-hour operational stability. *Nat. Energy* **5**, 596-604 (2020). <https://doi.org/10.1038/s41560-020-0653-2>

18. L. Qiu, S. He, Y. Jiang, D.-Y. Son, L.K. Ono et al., Hybrid chemical vapor deposition enables scalable and stable Cs-FA mixed cation perovskite solar modules with a designated area of 91.8 cm<sup>2</sup> approaching 10% efficiency. *J. Mater. Chem. A* **7**(12), 6920-6929 (2019). <https://doi.org/10.1039/C9TA00239A>
19. E. Bi, W. Tang, H. Chen, Y. Wang, J. Barbaud et al., Efficient perovskite solar cell modules with high stability enabled by iodide diffusion barriers. *Joule* **3**(11), 2748-2760 (2019). <https://doi.org/10.1016/j.joule.2019.07.030>
20. L. Qiu, Z. Liu, L.K. Ono, Y. Jiang, D.Y. Son et al., Scalable fabrication of stable high efficiency perovskite solar cells and modules utilizing room temperature sputtered SnO<sub>2</sub> electron transport layer. *Adv. Funct. Mater.* **29**(47), 1806779 (2018). <https://doi.org/10.1002/adfm.201806779>
21. H. Chen, F. Ye, W. Tang, J. He, M. Yin et al., A solvent- and vacuum-free route to large-area perovskite films for efficient solar modules. *Nature* **550**, 92-95 (2017). <https://doi.org/10.1038/nature23877>
22. Y. Hu, S. Si, A. Mei, Y. Rong, H. Liu et al., Stable large-area (10 × 10 cm<sup>2</sup>) printable mesoscopic perovskite module exceeding 10% efficiency. *Sol. RRL* **1**(2), 1600019 (2017). <https://doi.org/10.1002/solr.201600019>
23. G. Grancini, C. Roldan-Carmona, I. Zimmermann, E. Mosconi, X. Lee et al., One-Year stable perovskite solar cells by 2D/3D interface engineering. *Nat. Commun.* **8**, 15684 (2017). <https://doi.org/10.1038/ncomms15684>
24. A. Priyadarshi, L.J. Haur, P. Murray, D. Fu, S. Kulkarni et al., A large area (70 cm<sup>2</sup>) monolithic perovskite solar module with a high efficiency and stability. *Energy Environ. Sci.* **9**(12), 3687-3692 (2016). <https://doi.org/10.1039/C6EE02693A>
